# Supplementary material for: 13C Pathway Analysis for the Role of Formate in Electricity Generation by Shewanella Oneidensis MR-1 Using Lactate in Microbial Fuel Cells
Source: PubMed Central journal article supplement (PMC4751489; doi:10.1038/srep20941), 2016-02-12
Supplement: srep20941-s1.pdf [file srep20941-s1.pdf]

# Supplemental Information

## **<sup>13</sup>C Pathway Analysis for the Role of Formate in Electricity Generation by *Shewanella Oneidensis* MR-1 Using Lactate in Microbial Fuel Cells**

Shuai Luo<sup>1#</sup>, Weihua Guo<sup>2#</sup>, Kenneth Nealson<sup>3</sup>, Xueyang Feng<sup>2\*</sup>, and Zhen He<sup>1\*</sup>

<sup>1</sup> *Department of Civil and Environmental Engineering, Virginia Polytechnic Institute and State University, Blacksburg, VA 24061, USA*

<sup>2</sup> *Department of Biological System Engineering, Virginia Polytechnic Institute and State University, Blacksburg, VA 24061, USA*

<sup>3</sup> *Department of Earth Sciences, University of Southern California, Los Angeles, CA 90089, USA.*

# Those authors contributed equally to this work

\* Correspondence and requests for materials should be addressed to X.F. (xueyang@vt.edu) or Z.H. (zhenhe@vt.edu)

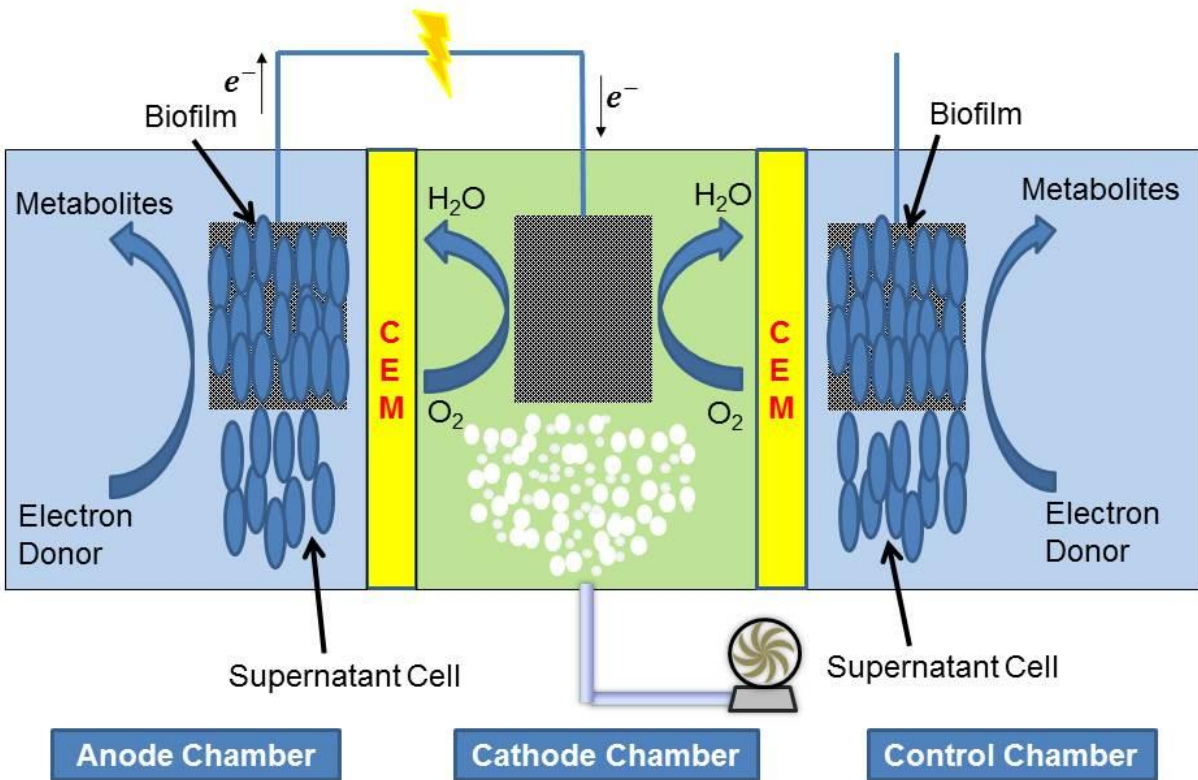

**Figure S1.** Schematic of a three-chamber system consisting of an anode chamber, a cathode chamber, and a control chamber. The electrodes in the anode and the cathode chambers were connected to form an electrical circuit (functioning MFC).
